# Supplementary material
Source: PubMed Central journal article supplement (PMC4490942)
Supplement: NIHMS692203-supplement-1.pdf [file NIHMS692203-supplement-1.pdf]

**Supplemental Figure 1**

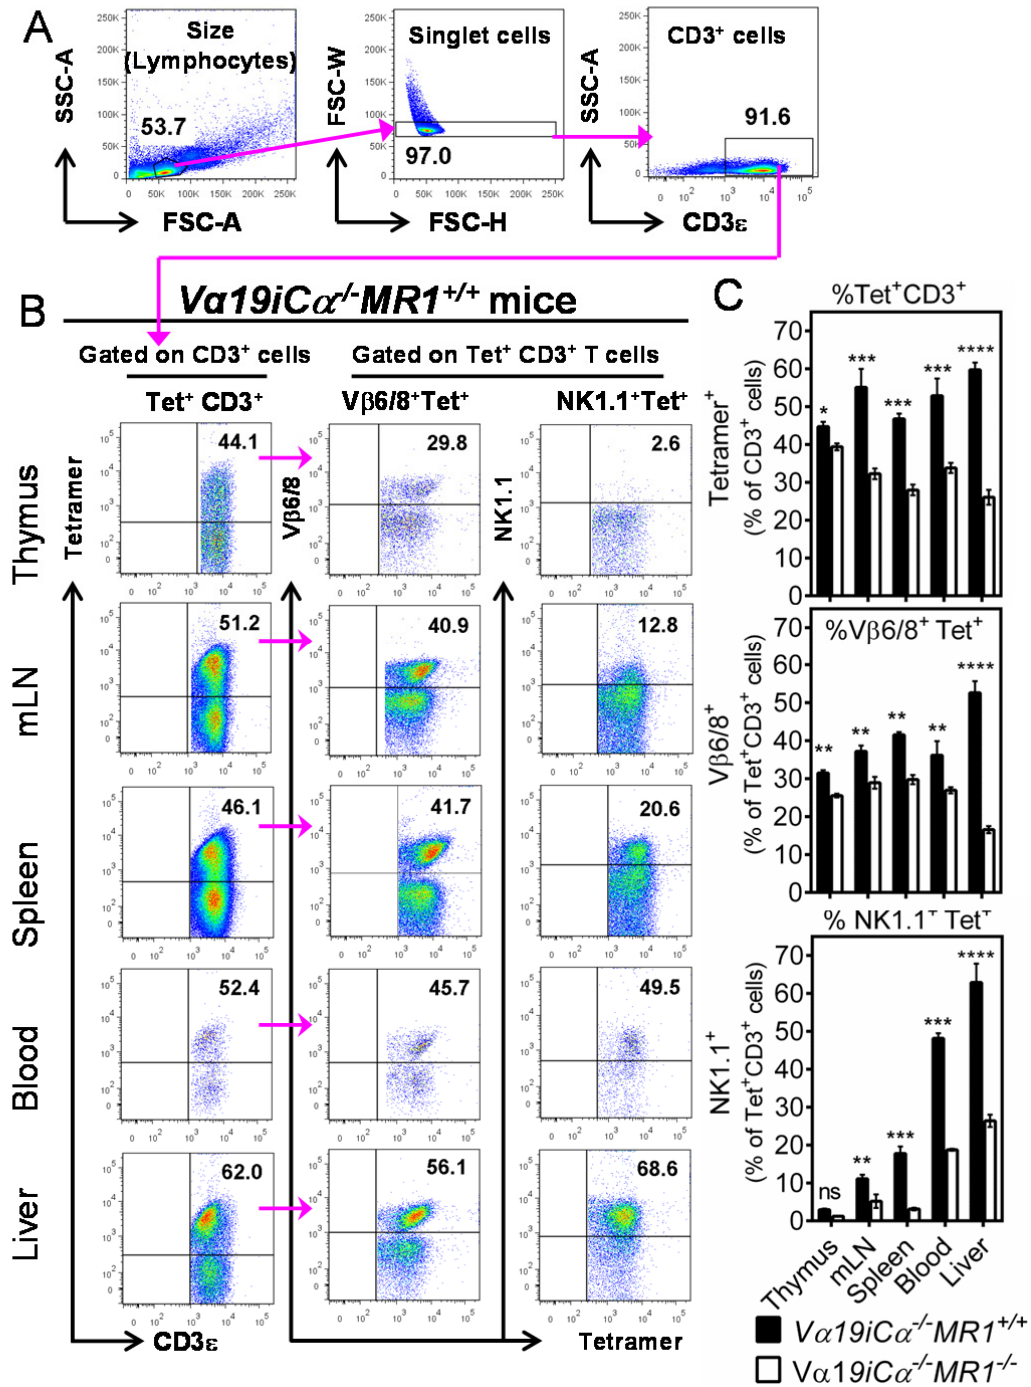

Supplemental Figure 1: Frequency and Vβ6/8, NK1.1 phenotype of tetramer<sup>+</sup> CD3<sup>+</sup> T cells in the thymus, secondary lymphoid organs and peripheral sites. (A). Gating strategy of SSC-A vs. FSC-A to define lymphocyte population, FSC-W vs. FSC-H for doublet

discrimination and SSC-A vs. CD3 $\epsilon$  for CD3 $^+$  T cells. **(B)** Representative FACS plots of tetramer $^+$  CD3 $^+$  T cells (*left dot plots column*), tetramer $^+$  V $\beta$ 6/8 $^+$  (*middle dot plots column*) and tetramer $^+$  NK1.1 $^+$  (*right dot plots column*) cells in the thymus (CD3 $^{\text{high}}$ , mature thymocytes), mesenteric lymph nodes (mLN), spleen, blood and liver from *V $\alpha$ 19iC $\alpha$  $^{-/-}$ MR1 $^{+/+}$*  mice. Numbers in the upper right quadrants are proportions of CD3 $^+$  cells that were tetramer $^+$  (left column) and tetramer $^+$  CD3 $^+$  T cells that expressed V $\beta$ 6/8 (middle column) and NK1.1 (right column). **(C)** Shown are bar graphs of proportions of tetramer $^+$  CD3 $^+$  T cells (top panel), V $\beta$ 6/8 $^+$  tetramer $^+$  CD3 $^+$  T cells (middle panel) and NK1.1 $^+$  tetramer $^+$  CD3 $^+$  T cells (bottom panel). Data shown are from more than three experiments. *P* values (obtained by 2way ANOVA, multiple comparison test) denote comparison between *V $\alpha$ 19iC $\alpha$  $^{-/-}$ MR1 $^{+/+}$*  (filled bars) and *V $\alpha$ 19iC $\alpha$  $^{-/-}$ MR1 $^{-/-}$*  (open bars). \**p*<0.05; \*\**p*<0.01, \*\*\**p*<0.001 and \*\*\**p*<0.0001.

## Supplemental Figure 2

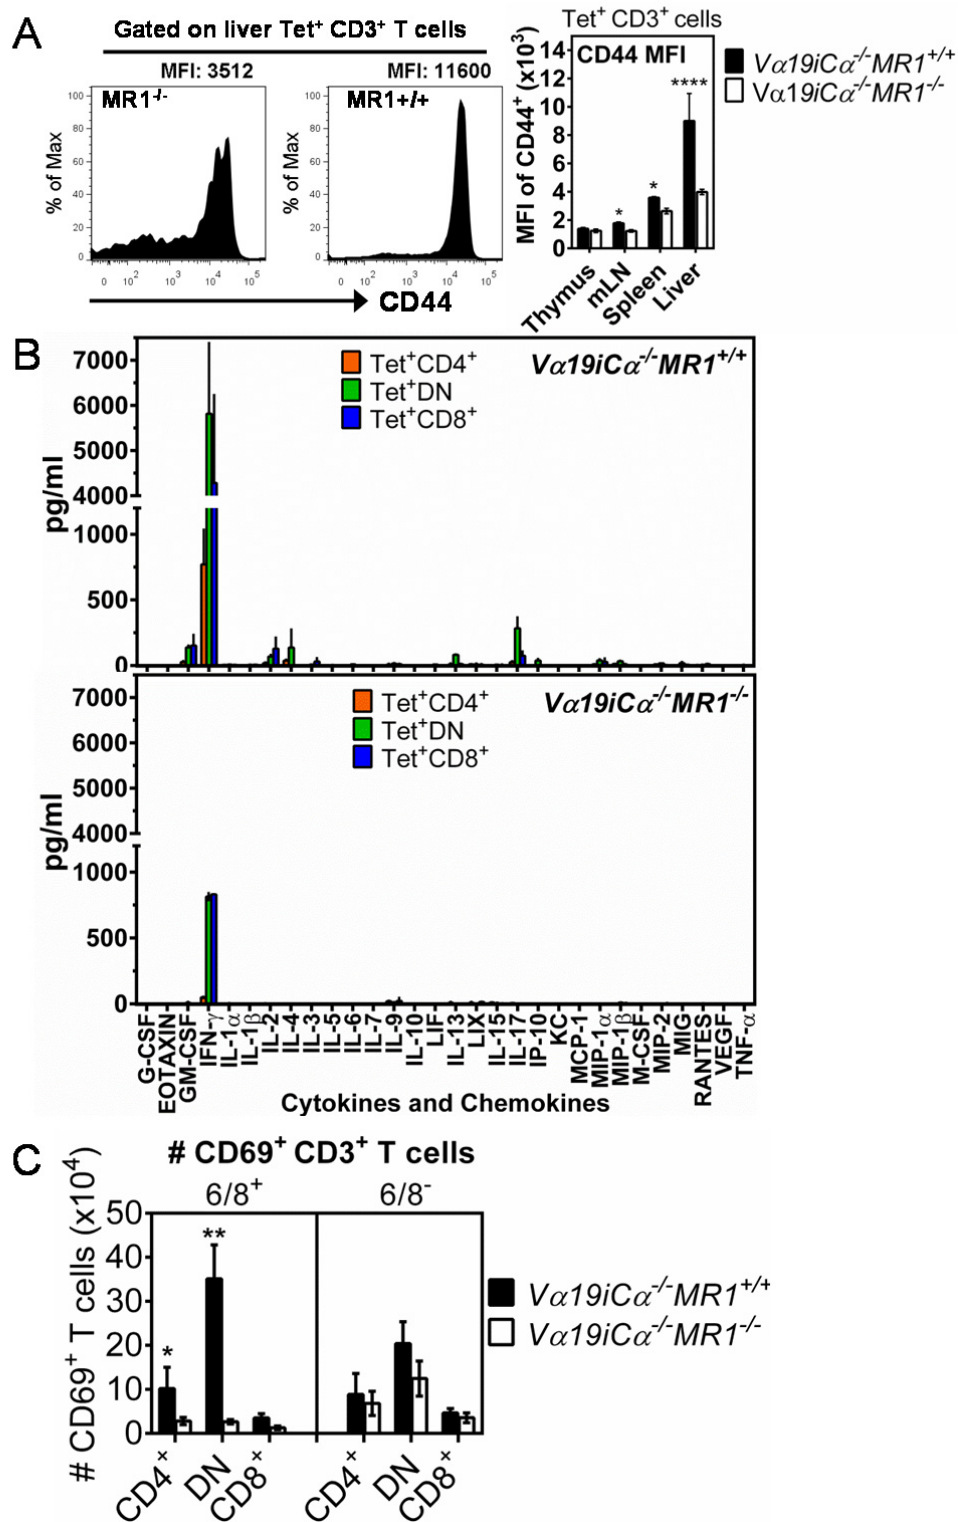

**Supplemental Figure 2:** (A) CD44 staining in tetramer<sup>+</sup> CD3<sup>+</sup> T cells in the thymus, secondary lymphoid organs (mLN and spleen) and peripheral cells (liver). (B) *Vα19iCα<sup>-/-</sup>*

*MR1*<sup>+/+</sup> T cells respond to IL-12 plus IL-18 better than *Vα19iTgMR1*<sup>-/-</sup> T cells. Purified splenic T cells from *Vα19iCα*<sup>-/-</sup>*MR1*<sup>+/+</sup> (top panel) or *Vα19iCα*<sup>-/-</sup>*MR1*<sup>-/-</sup> (bottom panel) mice were stained with antibodies specific for CD3ε, CD4, CD8α and MR1/RL tetramer, and tetramer<sup>+</sup> cells sorted by FACS. Sorted tetramer<sup>+</sup> T cells were rested overnight in medium and then cultured (2 x 10<sup>5</sup> cells/well) in triplicates with 500 pg/ml IL-12 plus 1000 pg/ml IL-18 in the absence of APC for 24h at 37°C. The indicated cytokines and chemokines were measured in supernatants using Multiplex bead array assays according to manufacturer's instructions (Milliplex MAP Assays from EMD Millipore). Tetramer<sup>+</sup> *Vα19iCα*<sup>-/-</sup>*MR1*<sup>+/+</sup> T cells (DN/CD8<sup>+</sup> > CD4<sup>+</sup>) produced more IFN-γ than their counterparts that developed in the absence of MR1. (C) Absolute numbers of Vβ6/8<sup>+/-</sup> CD69<sup>+</sup> CD3<sup>+</sup> T cells in the spleen of *Vα19iCα*<sup>-/-</sup>*MR1*<sup>+/+</sup> vs. *Vα19iCα*<sup>-/-</sup>*MR1*<sup>-/-</sup> mice. Data shown are from two separate experiments. *P* values were obtained by Mann-Whitney U-test and 2way ANOVA (multiple comparison test) (\**p*<0.05, \*\**p*<0.01 and \*\*\*\**p*<0.0001).

**Supplemental Figure 3**

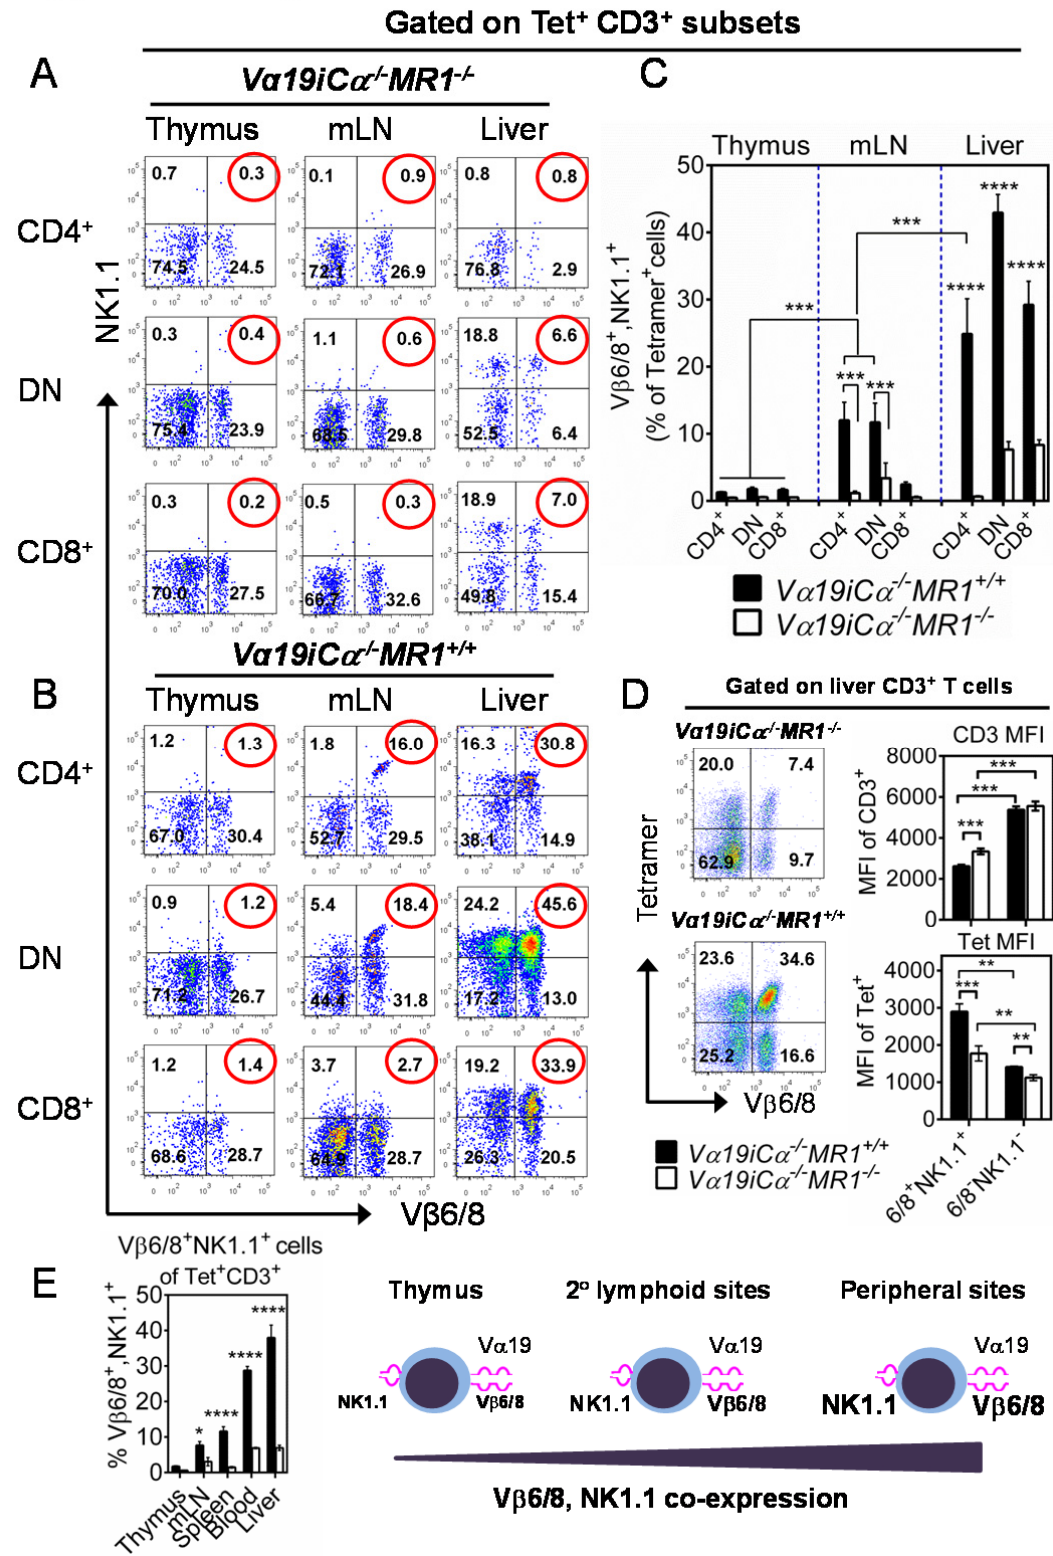

**Supplemental Figure 3: Gradual increase in frequency of tetramer<sup>+</sup> CD3<sup>+</sup> cell subsets co-expressing Vβ6/8 and NK1.1 comparing mature thymocytes with secondary lymphoid**

**organs and peripheral sites. (A and B)** Shows surface V $\beta$ 6/8.1-2 (X-axis) and NK1.1 (Y-axis) expression on tetramer<sup>+</sup> CD4<sup>+</sup> (*top dot plots*), DN (*middle dot plots*) or CD8<sup>+</sup> (*bottom dot plots*) in thymus, mesenteric lymph nodes, (mLN) and liver in uninfected *V $\alpha$ 19iC $\alpha$ <sup>-/-</sup>MR1<sup>-/-</sup>* (A) *V $\alpha$ 19iC $\alpha$ <sup>-/-</sup>MR1<sup>+/+</sup>* (B) mice. Numbers in the upper right quadrants are V $\beta$ 6/8.1-2<sup>+</sup> and NK1.1<sup>+</sup> cells. (C) Increasing proportions of V $\beta$ 6/8<sup>+</sup> and NK1.1<sup>+</sup> tetramer<sup>+</sup> CD3<sup>+</sup> T cell subsets from thymus (CD3<sup>high</sup>, mature thymocytes; n=9), mLN (n=5) and Liver (n=4). (D) *V $\alpha$ 19i* Tg cells developing with MR1 have higher affinity for MR1/RL complexes. Shown in the left panel are V $\beta$ 6/8 (X-axis) vs. tetramer (Y-axis) FACS plots of CD3<sup>+</sup> T cells in liver from *V $\alpha$ 19iC $\alpha$ <sup>-/-</sup>MR1<sup>-/-</sup>* or *V $\alpha$ 19iC $\alpha$ <sup>-/-</sup>MR1<sup>+/+</sup>* mice. Shown in the right panel are mean fluorescence intensities of CD3 $\epsilon$  (top bar graph) and tetramer (bottom bar graph) staining on liver tetramer<sup>+</sup> V $\beta$ 6/8<sup>+</sup>NK1.1<sup>+</sup> or V $\beta$ 6/8<sup>-</sup>NK1.1<sup>-</sup> CD3<sup>+</sup> T cells from *V $\alpha$ 19iC $\alpha$ <sup>-/-</sup>MR1<sup>+/+</sup>* or *V $\alpha$ 19iC $\alpha$ <sup>-/-</sup>MR1<sup>-/-</sup>* mice (n=4). Despite lower CD3 expression, *V $\alpha$ 19i* Tg T cells from MR1<sup>+/+</sup> mice display higher affinity for MR1/RL tetramers than *V $\alpha$ 19i* Tg cells from MR1<sup>-/-</sup> mice. Furthermore, tetramer<sup>+</sup> CD3<sup>+</sup> T cells expressing both V $\beta$ 6/8 and NK1.1 in *V $\alpha$ 19i* Tg MR1 sufficient mice display the highest affinity for tetramer binding. (E) Bar graph showing composite proportions of V $\beta$ 6/8<sup>+</sup>, NK1.1<sup>+</sup> among tetramer<sup>+</sup> CD3<sup>+</sup> T cells from MR1<sup>+/+</sup> (filled bars) and MR1<sup>-/-</sup> (open bars) mice and a summary illustration of progressive increases in V $\beta$ 6/8, NK1.1 co-expression on tetramer<sup>+</sup> MAIT cells with peripheral activation. *P* values were obtained by Mann-Whitney U-test and 2way ANOVA (multiple comparison test) (\**p*<0.05, \*\**p*<0.01, \*\*\**p*<0.001 and \*\*\*\**p*<0.0001).

## Supplemental Figure 4

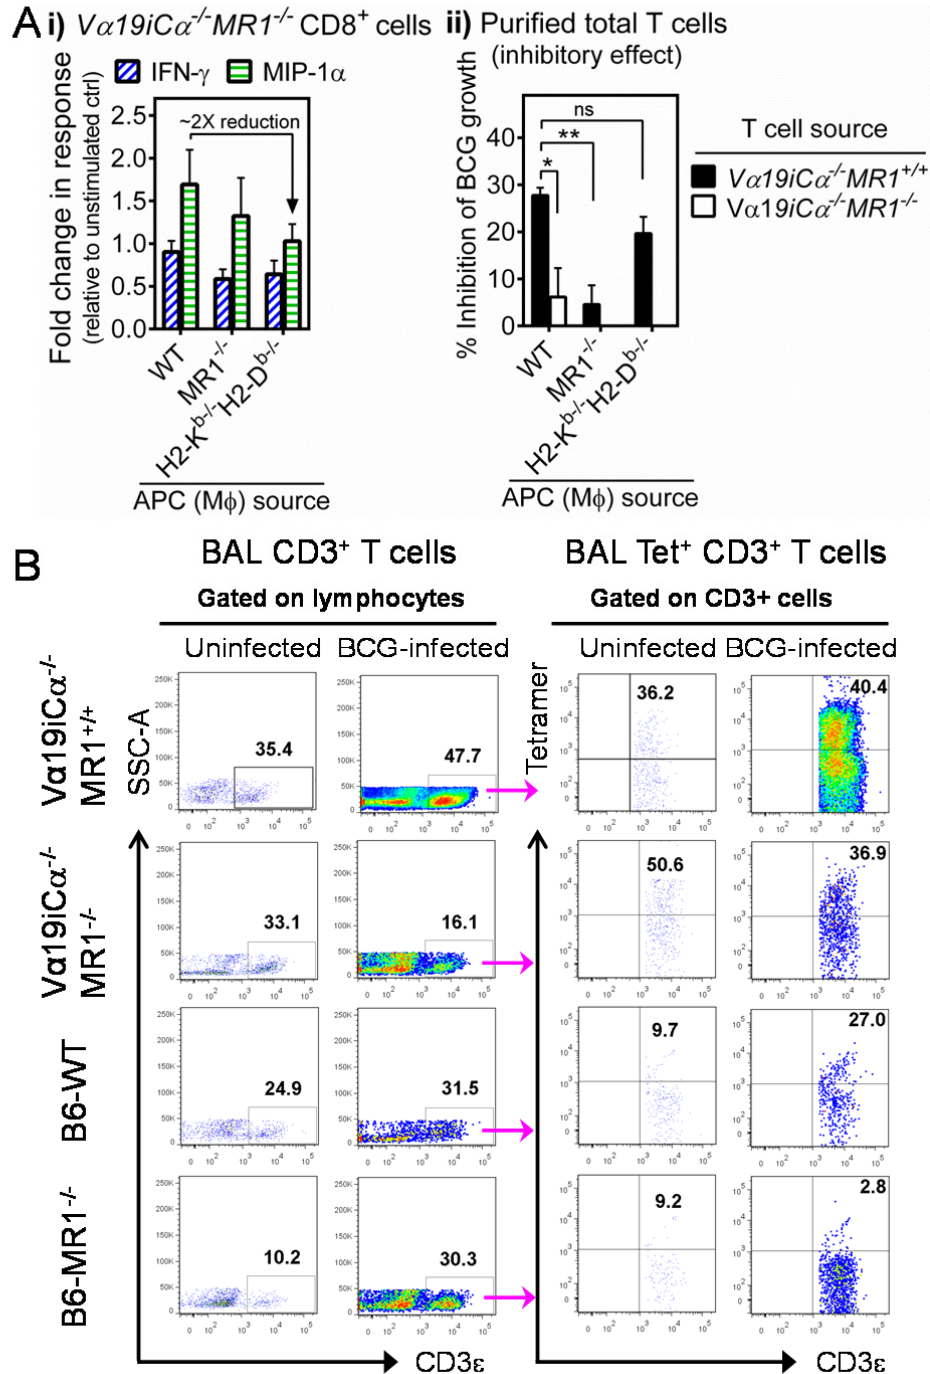

**Supplemental Figure 4:** (A) Evidence that  $V\alpha 19iC\alpha^{-/-}MR1^{-/-}$  T cells interact with MHC class 1a molecules. (A-i) Purified  $V\alpha 19iC\alpha^{-/-}MR1^{-/-}$  CD8<sup>+</sup> T cells from three individual mice were co-cultured for 24h at 37°C with uninfected or BCG Danish-infected BMDMφ from B6-WT, B6-MR1<sup>-/-</sup> and H2-K<sup>b/-</sup>/H2-D<sup>b/-</sup> mice. Activation of CD8<sup>+</sup> T cells was determined by



intracellular cytokine staining for IFN- $\gamma$  and MIP-1 $\alpha$ /CCL3 using flow cytometry. Shown are relative fold increases in CD8<sup>+</sup> T cell IFN- $\gamma$  and MIP-1 $\alpha$ /CCL3 responses. There were approximately 2-fold reductions in MIP-1 $\alpha$ /CCL3 responses when CD8<sup>+</sup> T cells were co-cultured with H2-K<sup>b</sup>/H2-D<sup>b</sup> double knockout APC, indicating recognition of epitopes presented by MHC class Ia molecules. **(A-ii)** Inhibition of intracellular mycobacteria growth by purified total T cells from *V $\alpha$ 19iC $\alpha$ <sup>-/-</sup>MR1<sup>-/-</sup>* mice was reduced in MR1 or MHC class Ia deficient macrophages, indicating a role for both MR1 and MHC class Ia molecules in the activation and function of *V $\alpha$ 19i* Tg T cells developing in the absence of MR1. **(B)** Representative FACS plots of CD3 $\epsilon$  (X-axis) vs. SSC-A (Y-axis) gated on lymphocyte population for CD3<sup>+</sup> T cells (left panel of dot plots) and CD3 $\epsilon$  (X-axis) vs MR1-5-OP-RU tetramer (Y-axis) gated on CD3<sup>+</sup> lymphocyte population for tetramer<sup>+</sup> CD3<sup>+</sup> T cells (right panel of dot plots) in BAL fluids from uninfected or BCG-infected mice.
